# Supplementary material for: Distinct plasmon resonance enhanced microwave absorption of strawberry-like Co/C/Fe/C core–shell hierarchical flowers via engineering the diameter and interparticle spacing of Fe/C nanoparticles
Source: Royal Society of Chemistry journal article supplement (doi:10.1039/c9ra04988f), 2019-01-01
Supplement: c9ra04988f1.pdf [file c9ra04988f1.pdf]

## Supporting Information

### **Distinctly plasmon resonance enhanced microwave absorption of strawberry-like Co/C/Fe/C core-shell hierarchical flowers via engineering the diameter and interparticle spacing of Fe/C nanoparticles**

*Zidong He,<sup>†</sup> Minmin Liu,<sup>†</sup> Lin Liu,<sup>†</sup> Guoxiu Tong,<sup>\*†</sup> Wenhua Wu,<sup>†</sup> and Xiaojuan Wang<sup>\*†</sup>*

<sup>†</sup> College of Chemistry and Life Sciences, Key Laboratory of the Ministry of Education for Advanced Catalysis Materials, Zhejiang Normal University, Jinhua 321004, China.

\* Corresponding Author. E-mail: tonggx@zjnu.cn Tel.: +86-579-82282269; Fax: +86-579-82282269.

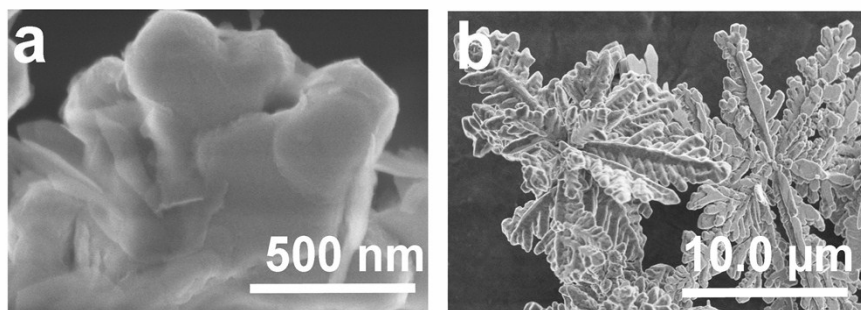

**Fig. S1.** SEM images of Co HFs.

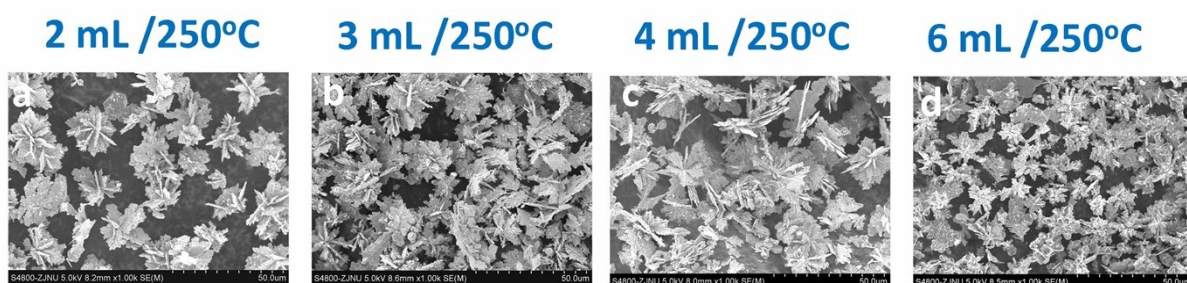

**Fig. S2.** SEM images of Co/C/Fe/C CSHFs formed under various  $\delta$ .

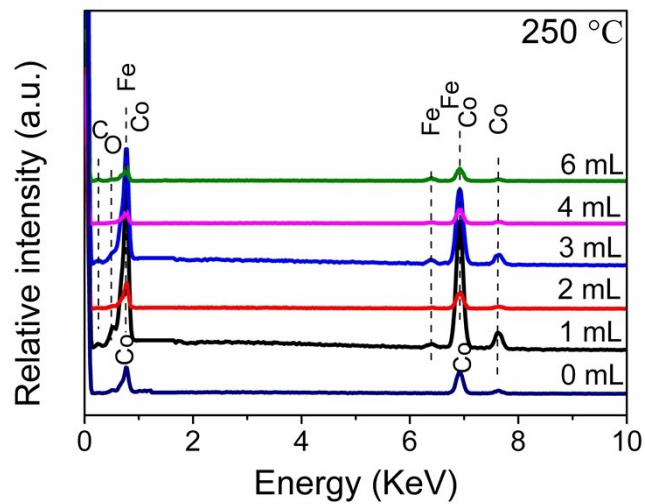

**Fig. S3.** EDX spectra of Co/C/Fe/C CSHFs formed under various  $\delta$

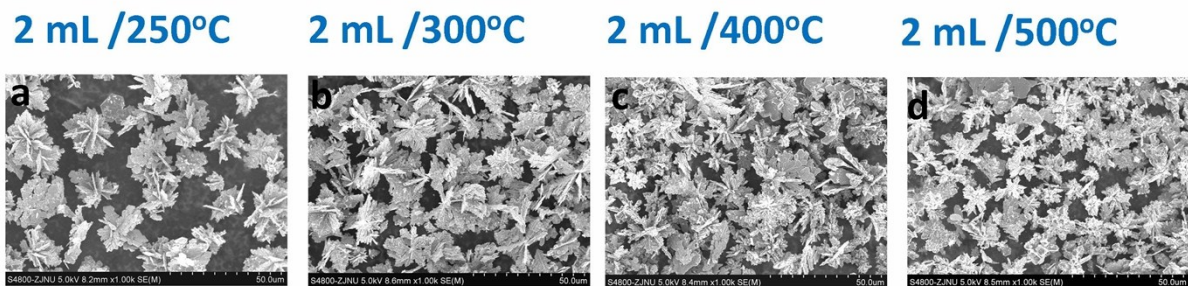

**Fig. S4.** SEM images of Co/C/Fe/C CSHFs formed under various  $T_d$ .

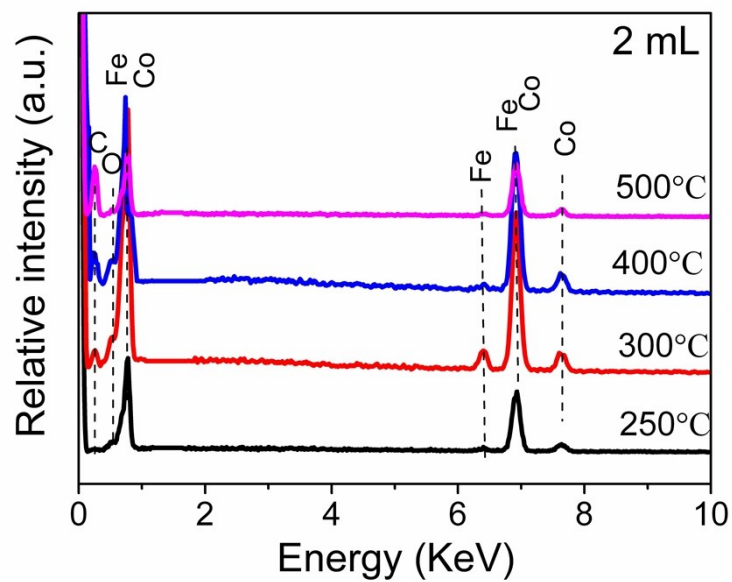

**Fig. S5.** EDX spectra of Co/C/Fe/C CSHFs formed under various  $T_d$ .

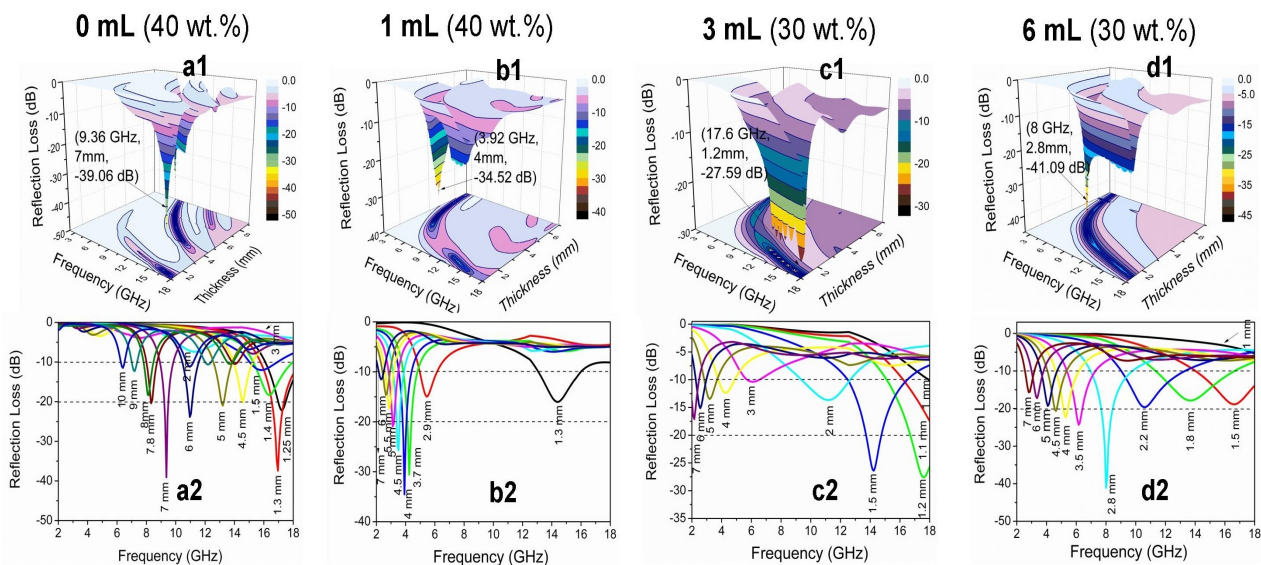

**Fig. S6.** (a1, b1, c1, d1) calculated 3D plots and (a2, b2, c2, d2) reflection loss curves of the paraffin composites containing samples with various mass fractions formed under various  $\text{Fe}(\text{CO})_5$  volumes.

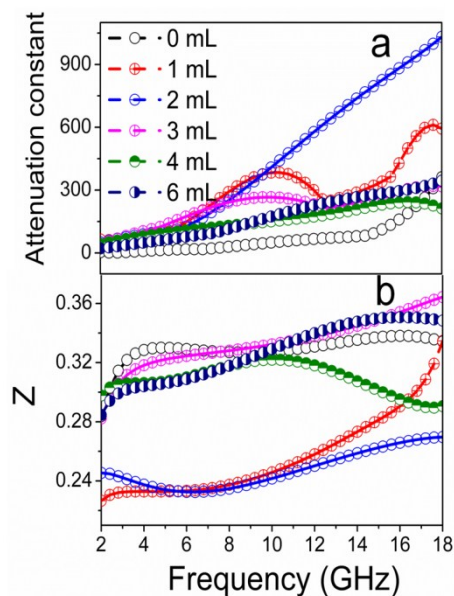

**Fig. S7.** (a) Attenuation constant ( $\alpha$ ) and (b) the modulus of the normalized characteristic impedance ( $Z$ , present Impedance matching) of the samples obtained under (a) various  $\delta$ .

In general, microwave absorption is determined by impedance matching and attenuation constant ( $\alpha$ ). The  $\alpha$  is calculated using the equation:  $\alpha = \frac{\sqrt{2}\pi f}{c} \sqrt{(\mu''\epsilon'' - \mu'\epsilon') + \sqrt{(\mu'\epsilon'' + \mu''\epsilon')^2 + (\mu''\epsilon'' - \mu'\epsilon')^2}}$ . The high  $\alpha$  means that more EM waves are absorbed by MAMA via converting them into thermal energy or interfere. Seen from Fig. S7a, the  $\alpha$  decreased in the following order:  $\alpha_2 > \alpha_1 > \alpha_3 > \alpha_6 > \alpha_4 > \alpha_0$ . These results indicate that Co/C/Fe/C CSHFs with strawberry-like surface have much higher  $\alpha$  than pure Co HFs owing to plasmon resonance and coupling caused by heterostructures with the strawberry-like surface. Impedance matching is defined by the modulus of the normalized characteristic impedance ( $Z$ ), which is calculate using the equation:  $Z = |Z_1 / Z_0|$ , where  $Z_1 = Z_0 \sqrt{\mu_r / \epsilon_r}$ . If  $Z$  value is close to 1, impedance matching will be high. In this case, more microwaves will enter the absorber without reflection at the air-absorber interface.  $Z$  as a function of frequency for all of the samples is shown in Fig. S7b. The  $Z$  values vary in the following order:  $Z_0 \approx Z_3 \approx Z_6 > Z_4 > Z_1 > Z_2$ . Obviously, Co/C/Fe/C CSHFs obtained at  $d = 3-6$  mL has as similar impedance matching to Co HFs.
